# Supplementary material for: Articular cartilage of the knee 3 years after ACL reconstruction: A quantitative T2 relaxometry analysis of 10 knees
Source: PubMed Central journal article supplement — Acta Orthop. 2015 Sep 4;86(5):605–10. doi: 10.3109/17453674.2015.1039426 (PMC4564784; doi:10.3109/17453674.2015.1039426), 2015-09-04
Supplement: ORT-86-605-s8418.pdf [file ORT-86-605-s8418.pdf]

## Supplementary article data

# Articular cartilage of the knee 3 years after ACL reconstruction

## A quantitative T2 relaxometry analysis of 10 knees

Ji-Hoon BAE<sup>1,5</sup>, Ali HOSSEINI<sup>1</sup>, Yang WANG<sup>2</sup>, Martin TORRIANI<sup>3</sup>, Thomas J GILL<sup>4</sup>, Alan J GRODZINSKY<sup>2</sup>, and Guoan LI<sup>1</sup>

<sup>1</sup> Bioengineering Laboratory, Department of Orthopaedic Surgery, Massachusetts General Hospital and Harvard Medical School, Boston; <sup>2</sup> Department of Biological Engineering, Massachusetts Institute of Technology, Cambridge; <sup>3</sup> Division of Musculoskeletal Imaging and Intervention, Massachusetts General Hospital and Harvard Medical School, Boston; <sup>4</sup> Harvard Medical School, Boston, MA, USA; <sup>5</sup> Department of Orthopaedic Surgery, Korea University Guro Hospital, Korea University College of Medicine, Seoul, Republic of Korea.

Correspondence: Li.Guoan@mgh.harvard.edu

Submitted 2014-12-17. Accepted 2015-03-09.

Table 3. Mean T2 values for the superficial zones of the articular cartilage of the contralateral healthy knees and the ACL-reconstructed knees at 3-year follow-up. Values are mean [SD] (95% CI)

|     | Contralateral knees | ACLR knees      | %Diff | p-value |
|-----|---------------------|-----------------|-------|---------|
| FM2 | 55 [4] (45–57)      | 61 [16] (52–71) | 12    | 0.2     |
| FM3 | 57 [5] (51–60)      | 67 [9] (62–73)  | 19    | 0.002   |
| FM4 | 56 [5] (47–59)      | 59 [14] (51–68) | 6     | 0.4     |
| FM5 | 57 [3] (53–58)      | 57 [5] (54–60)  | 16    | 0.3     |
| TM1 | 48 [3] (46–50)      | 51 [3] (50–53)  | 6     | 0.005   |
| TM2 | 54 [6] (50–57)      | 58 [7] (53–62)  | 7     | 0.1     |
| TM3 | 53 [5] (49–56)      | 54 [6] (50–57)  | 2     | 0.2     |
| FL1 | 56 [5] (51–60)      | 56 [9] (51–62)  | 1     | 0.2     |
| FL2 | 47 [3] (41–49)      | 52 [10] (45–58) | 10    | 0.6     |
| FL3 | 56 [5] (48–60)      | 58 [14] (49–66) | 2     | 0.3     |
| FL4 | 59 [8] (56–63)      | 58 [4] (56–61)  | -1    | 0.9     |
| FL5 | 54 [3] (51–55)      | 54 [4] (52–57)  | 1     | 0.2     |
| TL1 | 51 [5] (47–54)      | 50 [6] (46–53)  | -2    | 0.5     |
| TL2 | 51 [4] (47–53)      | 53 [6] (50–57)  | 6     | 0.5     |
| TL3 | 56 [7] (47–60)      | 57 [10] (51–63) | 2     | 0.7     |

%Diff: % of increase or decrease in T2 values in ACL-reconstructed knees compared to T2 values in contralateral healthy knees  
 ACLR: ACL-reconstructed; FM: medial femoral condyle; FL: lateral femoral condyle; TM: medial tibial plateau; TL: lateral tibial plateau.  
 FM1 or FL1 = cartilage over anterior to anterior meniscus horn; FM2 or FL2 = cartilage over anterior meniscus horn; FM3 or FL3 = cartilage between anterior and posterior meniscus horn; FM4 or FL4 = cartilage over posterior meniscus horn; FM5 or FL5 = cartilage behind posterior meniscus horn. TM1 or TL1 = cartilage under anterior meniscus horn; TM2 or TL2 = cartilage between anterior and posterior meniscus horn; TM3 or TL3 = cartilage under posterior horn.

**Table 2. Increases in T2 values (ms, %) in the superficial and deep zones of different cartilage regions of ACL-reconstructed knees compared to the contralateral side at 3-year follow-up**

| Patient No. | Superficial Zone                                                                                                                                                                                                                                | Deep Zone                                                                                                                                                                            |
|-------------|-------------------------------------------------------------------------------------------------------------------------------------------------------------------------------------------------------------------------------------------------|--------------------------------------------------------------------------------------------------------------------------------------------------------------------------------------|
| 1           | FM3 (3.7 ms, 8%), TM1 (8.1 ms, 16%),<br>TM2 (3.8 ms, 7%), FL1 (7.4 ms, 13%),<br>FL2 (19.4 ms, 41%), TL1 (2.1 ms, 4%)                                                                                                                            | FM2 (1.9 ms, 5.1%), FL1 (3.8 ms, 7%),<br>FL2 (3.1 ms, 7%), TL2 (20.1 ms, 34%),<br>TL3 (5.6 ms, 11%)                                                                                  |
| 2           | FM3 (8.2 ms, 16%), FM5 (4.1 ms, 8%),<br>TM1 (2.0 ms, 4%), TM2 (8.7 ms, 19%),<br>TM3 (2.4 ms, 5%), TL2 (1.5 ms, 3%)                                                                                                                              | FM4 (12.2 ms, 29%), FM5 (4.8 ms, 10%),<br>TM1 (4.6 ms, 11%), TM3 (5.6 ms, 12%),<br>FL1 (2.2 ms, 5%), TL1 (4.6 ms, 11%),<br>TL2 (4.8 ms, 10%), TL3 (1.9 ms, 4%)                       |
| 3           | FM2 (3.8 ms, 7%), FM3 (14.1 ms, 25%),<br>FM4 (24.1 ms, 45%) FM5 (6.3 ms, 11%),<br>TM2 (12.8 ms, 22%), FL3 (16.6 ms, 32%),<br>TL3 (15.4 ms, 31%)                                                                                                 | FM4 (4.0 ms, 8%), FM5 (5.5 ms, 11%),<br>TM1 (4.8 ms, 10%), TM3 (7.4 ms, 15%)                                                                                                         |
| 4           | FM3 (20.3 ms, 37%), FM4 (2.7 ms, 5%),<br>TM1 (5.2 ms, 12%), TM2 (10.9 ms, 24%),<br>TM3 (4.3 ms, 9%), FL1(1.8 ms, 4%),<br>FL3 (8.3 ms, 18%), FL4 (15.9 ms, 30%),<br>FL5 (2.8 ms, 5%), TL1 (4.6 ms, 11%),<br>TL2 (10.1 ms, 22%), TL3 (2.3 ms, 4%) | FM4 (1.7 ms, 4%), FL1 (3.5 ms, 8%),<br>FL3 (4.6 ms, 11%), FL4 (5.8 ms, 12%),<br>FL5 (1.9 ms, 4%), TL1 (3.2 ms, 7%),<br>TL2 (7.5 ms, 16%)                                             |
| 5           | FM2 (42.9 ms, 81%), FM3 (21.8 ms, 37%),<br>FM4 (3.0 ms, 5%), TM1 (3.9 ms, 8%),<br>TM2 (6.4 ms, 11%), TM3 (4.7ms, 10%),<br>FL2 (26.3 ms, 55%), FL3 (5.0ms, 9%),<br>FL4 (2.2 ms, 4%), TL1 (4.3ms, 9%),<br>TL3 (4.5 ms, 7%)                        | FM2 (15.9 ms, 33%), FM3 (7.9 ms, 19%),<br>FM4 (6.7 ms, 13%), TM1 (6.6 ms, 17%),<br>TM3 (6.6 ms, 15%), FL1 (2.3 ms, 5%),<br>FL3 (4.7 ms, 10%), FL4 (3.7 ms, 7%),<br>TL3 (6.9 ms, 14%) |
| 6           | FM2 (12.5 ms, 24%), FM3 (1.9 ms, 3%),<br>TM1 (2.3 ms, 5%), TM2 (4.1 ms, 8%),<br>FL2 (5.2 ms, 11%), FL5 (2.6 ms, 5%)                                                                                                                             | FM2 (2.5 ms, 5%), FL5 (3.8ms, 8%),<br>TL3 (2.4 ms, 5%)                                                                                                                               |
| 7           | FM3 (16.5 ms, 31%), FM4 (6.7 ms, 13%),<br>TM1 (1.8 ms, 4%), FL3 (13.4 ms, 25%),<br>TL3 (2.6 ms, 5%)                                                                                                                                             | FM4 (6.5 ms, 15%), TM1 (7.8ms,18%),<br>TM3 (10.9 ms, 27%)                                                                                                                            |
| 8           | FM3 (3.7 ms, 8%), TM1 (8.1 ms, 16%),<br>TM2 (3.8 ms, 7%), FL1 (7.4 ms, 13%),<br>FL2 (19.3 ms, 41%), TL1 (2.2 ms, 4%)                                                                                                                            | FM2 (2.0 ms, 5%), FL1 (3.8 ms, 7%),<br>FL2 (3.1 ms, 7%), TL2 (20.1 ms, 34%),<br>TL3 (5.6 ms, 11%)                                                                                    |
| 9           | FM3 (2.6 ms, 5%), TM2 (4.2 ms, 9%),<br>FL4 (2.5 ms, 5%), TL2 (14.8 ms, 31%),                                                                                                                                                                    | FL4 (4.9 ms, 10%), FL5 (2.4 ms, 5%),<br>TL1 (6.8 ms, 14%), TL2 (12.6 ms, 26%),<br>TL3 (4.9 ms, 10%)                                                                                  |
| 10          | FM2 (10.7 ms, 18%), FM3 (14.1 ms, 23%),<br>FM4 (25.1 ms, 39%), TM2 (7.6 ms, 12%),<br>TM3 (3.2 ms, 5%), FL1 (9.7 ms, 19%)                                                                                                                        | FM2 (18.6 ms, 42%), FM5 (6.8 ms, 13%),<br>TM3 (2.7 ms, 5%), FL1 (4.2 ms, 9%)                                                                                                         |

Values in parentheses are increases in T2 values (ms) and percentage increases (%).

FM: medial femoral condyle; FL: lateral femoral condyle; TM: medial tibial plateau; TL: lateral tibial plateau.

FM1 or FL1 = cartilage over anterior to anterior meniscus horn; FM2 or FL2 = cartilage over anterior meniscus horn; FM3 or FL3 = cartilage between anterior and posterior meniscus horn; FM4 or FL4 = cartilage over posterior meniscus horn; FM5 or FL5 = cartilage behind posterior meniscus horn. TM1 or TL1 = cartilage under anterior meniscus horn; TM2 or TL2 = cartilage between anterior and posterior meniscus horn; TM3 or TL3 = cartilage under posterior horn.
